# Supplementary material for: ‘Misdiagnosed and Misunderstood’: Insights into Rarer Forms of Dementia through a Stepwise Approach to Co-Constructed Research Poetry
Source: Preprints.org preprint supplement (doi:10.20944/preprints202311.1258.v1), 2023-11-20
Supplement: Supplementary file 1 [file supplementary]

Archive with 2 entries (2 files):
- Figure S1.pdf
- Figure S2.pdf
